# Supplementary material for: Quantitative spatial evaluation of tumor-immune interactions in the immunotherapy setting of metastatic melanoma lymph nodes
Source: PubMed Central journal article supplement (PMC9760971; doi:10.3389/fimmu.2022.1024039), 2022-12-05
Supplement: DataSheet_1.pdf [file DataSheet_1.pdf]

## Supplemental Materials

**Supplemental Table 1: Patient Demographics**

| PATIENT CHARACTERISTICS                                           |                                |       |                                        |       |
|-------------------------------------------------------------------|--------------------------------|-------|----------------------------------------|-------|
|                                                                   | Relapse < 1 year of NIVO start |       | Relapse > 1 year of NIVO or no relapse |       |
| N                                                                 | 9                              |       | 16                                     |       |
| Mean Age at initial diagnosis (SD)                                | 61.1 (16.1)                    |       | 58.4 (13.2)                            |       |
| Mean follow-up (days) after NIVO (SD)                             | 683.3 (322.5)                  |       | 906.4 (321.5)                          |       |
| Average time (days) from sample to start of adjuvant therapy (SD) | 38.3 (19.1)                    |       | 45.4 (19.6)                            |       |
|                                                                   | N                              | %     | N                                      | %     |
| Female                                                            | 3                              | 33.3% | 6                                      | 37.5% |
| Prior non-melanoma skin cancer diagnosis                          | 4                              | 44.4% | 3                                      | 18.8% |
| Prior radiation                                                   | 1                              | 11.1% | 1                                      | 5.3%  |
| Tumor characteristics at initial diagnosis                        |                                |       |                                        |       |
| Mean Breslow thickness, mm (SD)                                   | 2.5 (2.0)                      |       | 3.5 (2.3)                              |       |
| Breslow thickness not recorded                                    | 0                              | 0.0%  | 5*                                     | 31.3% |
| Ulceration present                                                | 1                              | 11.1% | 4                                      | 25.0% |
| Ulceration not recorded                                           | 1                              | 11.1% | 7                                      | 43.8% |
| Average Mitotic rate, per mm <sup>2</sup> (SD)                    | 2.5 (2.0)                      |       | 5.3 (4.1)                              |       |
| Mitotic Rate not recorded                                         | 1                              | 11.1% | 6                                      | 37.5% |
| Detected Mutations                                                |                                |       |                                        |       |
| BRAF V600E                                                        | 4                              | 44.4% | 5                                      | 26.3% |
| OTHER                                                             | 1                              | 11.1% | 4                                      | 21.1% |
| None identified or testing not done                               | 4                              | 44.4% | 10                                     | 52.6% |
| Study Sample collected at initial diagnosis or recurrence         |                                |       |                                        |       |
| Initial Diagnosis                                                 | 3                              | 33.3% | 11                                     | 68.8% |
| Recurrence                                                        | 6                              | 66.7% | 5                                      | 31.3% |

\* Four patients with unknown primary and one patient with initial pathology unavailable

**Supplemental Table 2: Antibody Panel Design**

| Conjugate | Antibody Name | Vendor            | Cat No         |
|-----------|---------------|-------------------|----------------|
| Cy 2      | CD15          | abcam             | ab212391       |
|           | ASMA          | abcam             | ab240654       |
| Cy 3      | CD4           | abcam             | ab181724       |
|           | CD8           | Novus Biologicals | 2PABX210601    |
|           | CD31          | abcam             | ab222431       |
|           | CD27          | abcam             | ab192336       |
|           | CD56          | abcam             | ab215981       |
|           | CD206         | abcam             | ab64693        |
|           | HLA-I         | abcam             | ab70328        |
|           | CD163         | Bio-rad           | MCA1853        |
|           | CD20          | abcam             | ab166865       |
|           | CD11C         | abcam             | ab216655       |
|           | CD21          | abcam             | ab240987       |
|           | TCF7          | Cell Signaling    | 2203BF         |
|           | PANCK         | Sigma             | CS992          |
|           | Ki67          | abcam             | ab197547       |
|           | SOX10         | abcam             | ab239751       |
|           | KAPPA         | abcam             | ab232152       |
|           | CD38          | abcam             | ab204940       |
|           | MPO           | abcam             | ab221847       |
| CD19      | abcam         | ab237772          |                |
| Tryptase  | Biolegend     | 369402            |                |
| GP100     | abcam         | ab787             |                |
| Cy 5      | NaKATPase     | abcam             | ab76020        |
|           | FOXP3         | abcam             | ab96048        |
|           | PDL1          | abcam             | ab221612       |
|           | CD3           | abcam             | ab17143        |
|           | GZB           | abcam             | ab219803       |
|           | CD28          | R&D Systems       | AF-342-PB      |
|           | CD86          | Cell Signaling    | 91882BF        |
|           | CD45          | abcam             | ab8216         |
|           | CASP3         | Cell Signaling    | 96618F         |
|           | CD16          | abcam             | ab215977       |
|           | CTLA4         | BioSB             | BSB2885        |
|           | CD11b         | abcam             | ab238794       |
|           | LAG3          | abcam             | ab227579       |
|           | S6            | Santa Cruz        | SC-74459 AF647 |
|           | HLAII         | Santa Cruz        | SC-53302       |
|           | CD68          | Epredia           | MS-397P        |
|           | CD14          | abcam             | ab214438       |
|           | MART1         | abcam             | ab212366       |
| PD1       | abcam         | ab186928          |                |
| B2M       | abcam         | ab237032          |                |
| LAMBDA    | abcam         | ab196673          |                |
| ANXV      | Biolegend     | 640901            |                |

**Supplemental Table 3:** Phenotypic cell classification model. For manual expert annotations in QuPath the following immune, tumor and stroma cell subsets were differentiated by leveraging co-expression of the antibodies in the MxIF panel. Expert annotations were used as the training dataset for the phenotypic classification model described in the Methods.

| Immune            |             |              |              |                 |                |            |             | Tumor        | Stroma      |
|-------------------|-------------|--------------|--------------|-----------------|----------------|------------|-------------|--------------|-------------|
| Cytotoxic T cells | B cell      | Tregs        | Macrophage   | Dendritic cells | Helper T cells | Neutrophil | Monocyte    | Tumor        | Stroma      |
| <b>CD8</b>        |             |              |              |                 |                |            |             |              |             |
| CD3               | <b>CD20</b> |              |              |                 |                |            |             |              |             |
|                   | CD19        | <b>FoxP3</b> |              |                 | No FoxP3       |            |             |              |             |
|                   | CD21        | CD4          | <b>CD163</b> |                 | No CD11c       |            |             |              |             |
|                   |             | CD3          | CD14         | <b>CD11c</b>    | No CD163       |            |             |              |             |
|                   |             |              | CD16         | CD14            | <b>CD4</b>     |            | No CD11c    |              |             |
|                   |             |              | HLAII        | CD16            | CD3            | <b>MPO</b> | No CD163    |              |             |
|                   |             |              |              | HLAII           |                | CD15       | <b>CD16</b> |              |             |
|                   |             |              |              |                 |                |            | CD14        | <b>SOX10</b> |             |
|                   |             |              |              |                 |                |            |             | gp100        | <b>αSMA</b> |
|                   |             |              |              |                 |                |            |             | MART1        |             |

**Supplemental Figure 1:** Virtual H&E maps of each lymph node tissue sample (n=25 cases). Pathologist-annotated tumor core regions used for analysis are indicated by red squares (n=416 FOVs).

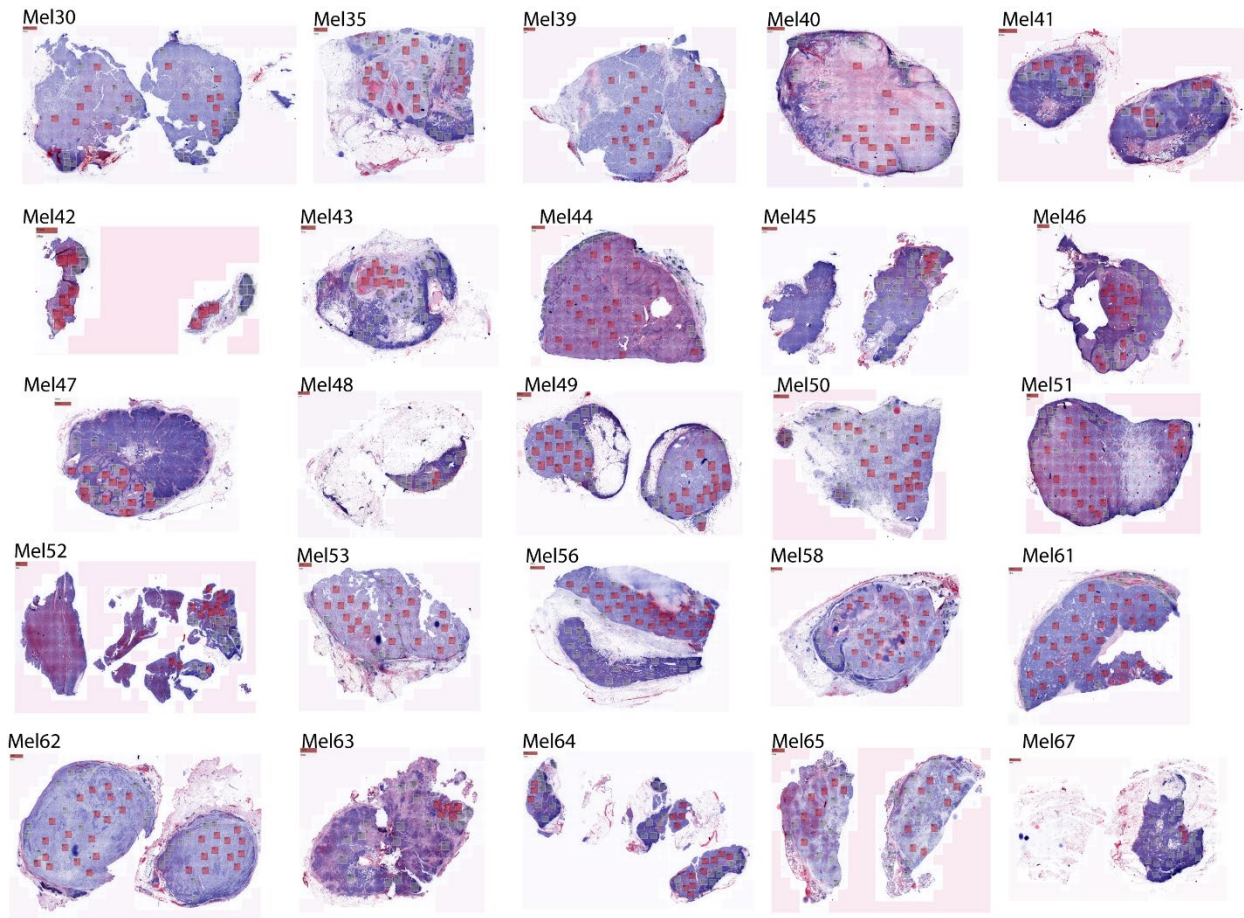

**Supplemental Figure 2:** Neighborhood size derivation. To determine optimal neighborhood size for the current histology (tumor FOVs in melanoma lymph node) all neighborhoods possessing at least 1 neighbor in addition to the center index cell were plotted from each FOV (line) against radius size in pixels ranging from 0-200 pixels (A). For the current tissue histology, a neighborhood size of 57 pixels represented the 90<sup>th</sup> percentile of all neighborhoods and was used as the neighborhood size for all downstream analysis (B).

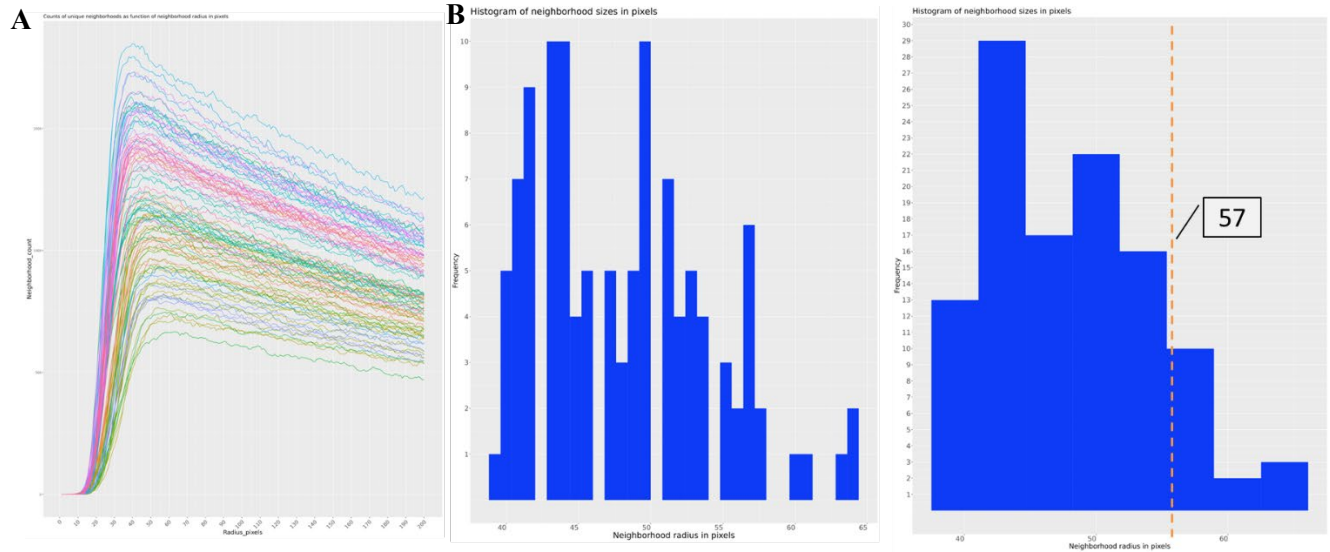

**Supplemental Figure 3:** TIL scoring of metastatic lymph nodes. H&E serial section of metastatic lymph node biopsy was scored according to TIL scoring criteria as previously described (ref 30). Average score was not significantly different between the response groups.

| Recurrence     |           | No Recurrence |          |
|----------------|-----------|---------------|----------|
| Sample         | Score     | Sample        | Score    |
| Mel30          | 1         | Mel40         | 2        |
| Mel35          | 1         | Mel42         | 2        |
| Mel39          | 2         | Mel44         | 2        |
| Mel41          | 1         | Mel45         | 2        |
| Mel43          | 2         | Mel46         | 2        |
| Mel47          | 1         | Mel49         | 2        |
| Mel48          | 2         | Mel50         | 3        |
| Mel51          | 2         | Mel52         | 2        |
| Mel57          | 3         | Mel56         | 1        |
|                |           | Mel58         | 1        |
|                |           | Mel61         | NA       |
|                |           | Mel62         | NA       |
|                |           | Mel63         | NA       |
|                |           | Mel64         | NA       |
|                |           | Mel65         | 2        |
|                |           | Mel67         | 3        |
| <b>Average</b> | 1.666667  |               | 2        |
| <b>Std Dev</b> | 0.707107  |               | 0.603023 |
| <b>T-test</b>  | 0.2723454 |               |          |

| Scoring criteria as defined by Ref 30. |                         |
|----------------------------------------|-------------------------|
| <b>0</b>                               | TILs absent             |
| <b>1</b>                               | mild TIL infiltrate     |
| <b>2</b>                               | moderate TIL infiltrate |
| <b>3</b>                               | marked TIL infiltrate   |

*\*Mel61-64 serial H&E not available for scoring*
